# Supplementary material for: Human-elephant conflict induced social vulnerability of subsistence farmers in Nepal
Source: Research Square preprint supplement (doi:10.21203/rs.3.rs-7600534/v1), 2025-09-25
Supplement: Supplementary file 1 [file 5bade22671269644858d869c.docx]

**Human-elephant conflict induced social vulnerability of subsistence farmers in Nepal**

**Supplementary files**

*Supplementary File S1*: The questionnaire used to understand subsistence Farmers expose, sensitivity and adaptive capacity for human-elephant conflict in lowland Nepal

1. Name
2. Address
3. Age
4. Sex:
   1. Male
   2. Female
5. Marital status
6. Size of household
7. Level of education attained
8. Length of residence
9. Farm size(s)
10. No. of livestock
11. What is the land use type of the village? a. rain fed b. irrigated c. dry land d. orchard e. grazing land f. barren/ fallow land.
12. Please list the name of the animals responsible for HWC

*Exposure and sensitivity*

1. Did you experience HEC?
   1. Yes
   2. No
2. If yes to Question 11, how do you perceive the HEC threats by elephants?

(a) Increasing

b) Decreasing

c) Same

1. What types of HEC incidence you have experienced?
2. Human deaths b. Human injuries c. Crop damage d. property damage e. Livestock damage.
3. What time did you notice elephants in your village?..........................
4. How many times have you experienced crop damage in the last five years?
5. *How many elephants were present when you sighted them?*
6. What methods do you employ to protect your crop? A. active and passive measures.
7. How effective are the methods you use for crop protection?
8. What crops do elephants eat? Types of crops raided.
9. Components and descriptions of social vulnerability to measure the adaptive capacity on human-elephant conflict, categorized under the Sustainable Livelihoods Framework.

| S.N. | Descriptions |
| --- | --- |
| 0 (Absent) | 2 (Low) | 3 (Medium) | 4 (High) |
| **1** | **Human Capital** |  |  |  |  |
| 1.1 | Level of Environmental Awareness |  |  |  |  |
| 1.2 | Level of formal education |  |  |  |  |
| 1.3 | Ability to prevent diseases and respond to natural disasters risk |  |  |  |  |
| 1.4 | Levels of skills in HEC mitigations |  |  |  |  |
| 1.5 | Level of skills development |  |  |  |  |
| **2** | **Financial Capital** |  |  |  |  |
| 2.1 | Level of local investment in conflict mitigation |  |  |  |  |
| 2.2 | Adequacy of financial resources for conflict mitigation |  |  |  |  |
| 2.3 | Availability of financial capital for conflict mitigation |  |  |  |  |
| 2.4 | Access to innovation |  |  |  |  |
| **3** | **Physical Capital** |  |  |  |  |
| 3.1 | Existence of conflict mitigation infrastructure |  |  |  |  |
| 3.2 | Adequacy of conflict mitigation infrastructure |  |  |  |  |
| 3.3 | Affordability of conflict mitigation measures |  |  |  |  |
| 3.4 | Effectiveness of existing conflict mitigation infrastructure |  |  |  |  |
| **4** | **Natural Capital** |  |  |  |  |
| 4.1 | Contribution of natural resources to local socio-economic and cultural wellbeing |  |  |  |  |
| 4.2 | Adequacy of natural resource base for livelihoods |  |  |  |  |
| 4.3 | Adequacy of natural resource base for livelihoods |  |  |  |  |
| 4.4 | Level of crop diversification |  |  |  |  |
| **5** | **Social Capital** |  |  |  |  |
| 5.1 | Level of community commitment to conflict mitigation |  |  |  |  |
| 5.2 | Level of trust in conflict mitigation efforts |  |  |  |  |
| 5.3 | Strength of social networks for conflict mitigation |  |  |  |  |
| 5.4 | Level of community cooperation in conflict mitigation |  |  |  |  |
| 5.5 | Level of social coherence |  |  |  |  |
| 5.6 | Use of traditional ecological knowledge |  |  |  |  |

*Supplementary File S2:* Total number of respondents from each district

| District | Number of people interviewed |
| --- | --- |
| Banke | 4 |
| Bara | 57 |
| Bardiya | 336 |
| Chitwan | 78 |
| Dhanusha | 10 |
| Ilam | 5 |
| Jhapa | 152 |
| Kanchanpur | 84 |
| Mahottari | 1 |
| Makwanpur | 32 |
| Morang | 8 |
| Parsa | 135 |
| Rautahat | 5 |
| Saptari | 59 |
| Sarlahi | 3 |
| Sindhuli | 9 |
| Siraha | 13 |
| Sunsari | 53 |
| Udaypur | 16 |

*Supplementary File S3*. Characteristics of household respondents

| Variables | Variable Components | Number | Percentage % |
| --- | --- | --- | --- |
| Gender | Female | 285 | 27 |
|  | Male | 775 | 73 |
| Marital status | Married | 843 | 79 |
| Single | 75 | 7 |
| Widow Female | 50 | 5 |
| Widow Male | 92 | 9 |
| Education status | Higher education | 5 | <1 |
|  | Illiterate | 517 | 49 |
|  | literate | 202 | 19 |
|  | Primary level | 207 | 19 |
|  | Secondary level | 129 | 12 |
| Year of residence | <10 years | 46 | 4 |
|  | 10-25 years | 124 | 12 |
|  | 25-50 years | 344 | 32 |
|  | > 50 years | 546 | 52 |
| Cast/Ethnicity | BCT | 384 | 36 |
|  | Dalit | 117 | 11 |
|  | Janjati | 487 | 46 |
|  | Madhesi | 61 | 6 |
|  | Muslim | 11 | 1 |
|  |  |  |  |

*Supplementary File S4*: Land ownership and crop damage status

|  | Variables | Number | Percentage |
| --- | --- | --- | --- |
| Land ownership (ha) | Landless (0) | 65 | 6 |
|  | Land having (<0.5) | 572 | 54 |
|  | Land having (0.5-1) | 222 | 21 |
|  | Land (>1) | 201 | 19 |

Note: landless people do not have their own land but work in other people’s land as lease.

*Supplementary File S5*: Representative cases of exposure and sensitivity of human-elephant conflict in study area

1. A 30-year-old woman from Bara district lost her husband while he was herding cattle in the forest. The victim was the family’s sole earner, and the compensation received was insufficient to support her family. The family called for job replacement and improved elephant management such as electric fencing.
2. A woman in Bara lost her daughter-in-law to an elephant attack. The victim’s family lived in encroached forest land, and compensation was received, but the family has since migrated.
3. A man from Bara described annual crop and life losses due to elephants. He criticized the lack of legal land rights and poor elephant management. Construction of infrastructure without considering elephant corridors worsens their situation.
4. A resident of Bara lost his child to an elephant attack. Although the family received the relief, they stressed that no amount of compensation could replace the loss of child. The incident led to calls for better elephant management. The family noted increased forest encroachment and food scarcity as conflict drivers.
5. A household head (man) from Bara district lost his life while chasing elephants from crop fields. The death caused huge economic hardship forcing children to quit school and join workforce at their early age. The family had small landholdings but did not have land ownership certificate and asked for providing the scholarship and other trainings to sustain their lives.
6. A 35-year-old woman from Bara lost her husband in an elephant attack. The family faced emotional and economic crises, receiving no compensation. She strongly demanded the need for government recognition.
7. An elderly man from Sunsari reported his wife being maimed by an elephant while collecting forest products. The family received no compensation, forcing them to sell land to afford medical treatment.
8. A woman from Bardiya described losing her child during an elephant encounter near her mother's house. She observed the child being attacked and suffered long-term psychological effects.
9. A woman from Bardiya recounted a neighbor’s fatal elephant encounter. The community had to call the army to drive the elephant away. The victim’s husband remarried soon after the incident.
10. A 45-year-old woman from Bardiya lost her husband while working in the farmland. She was also injured. Hospitalization costs the family heavily. Their son met with an accident while returning home.
11. A woman from Sindhuli lost her husband, who was attacked while fishing under the influence of alcohol. She now lives alone, struggling to care for her children.
12. A 56-year-old man from Sindhuli described the destruction of his house and crops by elephants. His family includes two blind children. They have received no compensation.
13. A woman from Bardiya lost her husband when their house was attacked by an elephant. She sustained injuries and now raises her children alone with minimal external support.
14. A man from Morang reported a neighbor’s death during crop guarding. The elephant later desecrated the grave. The community contributes to relief funds and provides tents and supplies.
15. A man from Rautahat lost his daughter during a nighttime elephant raid. The incident caused long-term trauma. Compensation was received, but emotional pain remains unaddressed.
16. A woman from Sunsari lost her husband in an elephant attack while they were at home. The elephant trampled the dead body several times. The government provided NRs 2500 annually for four years to cover children’s school fees.
17. A family in Dhanusa district lost both parents and a daughter while they were collecting forage in nearby forest. The family is landless and requests employment support from the government.
18. A family man from Sindhuli lost an only son during a mandatory elephant-chasing event. The boy’s dead body was found a day later in the forest. The family is now childless.
19. An elderly man from Parsa described his son’s death inside a temple. The boy was killed by an elephant when he attacked the animal with a trident. The dead body was guarded by the elephant for two days.
20. A 47-year-old woman from Saptari lost her husband while guarding crops. The elephant returned days later to desecrate his grave, traumatizing the community.

*Supplementary File S6*: Categorization of the Social Livelihood Framework as the adaptive capacity of farmers to human-elephant conflict

| SLF component | Absent % | Low % | Medium % | High % |
| --- | --- | --- | --- | --- |
| 1. Human Capital |  |  |  |  |
| Level of environmental awareness | 16.39 | 19.19 | 53.22 | 11.2 |
| Level of formal education | 18.91 | 23.81 | 45.24 | 12.04 |
| Ability to respond to health and natural disaster risks | 14.99 | 17.65 | 54.9 | 12.46 |
| Level of conflict mitigation skills | 20.45 | 71.57 | 7.42 | 0.56 |
| Level of skills development | 3.78 | 65.13 | 30.53 | 0.56 |
| 2. Financial Capital |  |  |  |  |
| Level of local investment in conflict mitigation | 22.41 | 47.9 | 14.71 | 14.99 |
| Adequacy of financial resources for conflict mitigation | 24.65 | 52.38 | 15.27 | 7.7 |
| Availability of financial capital for conflict mitigation | 25.21 | 52.52 | 14.85 | 7.42 |
| Access to innovation | 4.34 | 64.29 | 30.67 | 0.7 |
| 3. Physical capital |  |  |  |  |
| Existence of conflict mitigation infrastructure | 24.51 | 59.94 | 14.85 | 0.7 |
| Adequacy of conflict mitigation infrastructure | 24.79 | 59.66 | 14.85 | 0.7 |
| Affordability of conflict mitigation measures | 23.53 | 59.66 | 15.41 | 1.4 |
| Effectiveness of existing conflict mitigation infrastructure | 19.89 | 69.89 | 9.66 | 0.56 |
| 4. Natural capital |  |  |  |  |
| Contribution of natural resources to local socio-economic and cultural wellbeing | 17.65 | 66.67 | 15.27 | 0.42 |
| Adequacy of natural resource base for livelihoods | 13.87 | 25.07 | 10.36 | 50.7 |
| Effectiveness of elephant habitat management practices | 44.82 | 28.99 | 21.29 | 4.9 |
| Level of crop diversification | 4.34 | 60.78 | 28.85 | 6.02 |
| 5. Social capital |  |  |  |  |
| Level of community commitment to conflict mitigation | 16.39 | 58.26 | 24.23 | 1.12 |
| Level of trust in conflict mitigation efforts | 14.43 | 39.08 | 18.63 | 27.87 |
| Strength of social networks for conflict mitigation | 24.65 | 65.55 | 9.38 | 0.42 |
| Level of community cooperation in conflict mitigation | 15.97 | 15.13 | 26.89 | 42.02 |
| Level of social coherence | 4.62 | 66.11 | 28.29 | 0.98 |
| Use of traditional ecological knowledge | 3.92 | 66.25 | 29.41 | 0.42 |
